# Supplementary material for: SET contributes to the epithelial-mesenchymal transition of pancreatic cancer
Source: PubMed Central journal article supplement (PMC5620228; doi:10.18632/oncotarget.19067), 2017-07-07
Supplement: oncotarget-08-67966-s001.pdf [file oncotarget-08-67966-s001.pdf]

## SET Contributes to the epithelial-mesenchymal transition of pancreatic cancer

### SUPPLEMENTARY MATERIALS

Supplementary Table 1: Clinical and histological characterization of human pancreatic tumor samples

| Sample | Gender | Age | Appearance | Diagnosis                                           | Tumor grade                        | Stage        |
|--------|--------|-----|------------|-----------------------------------------------------|------------------------------------|--------------|
| N1     | Male   | 66  | Normal     | Adenocarcinoma of pancreas                          | AJCC G2: Moderately differentiated | Normal       |
| N2     | Male   | 37  | Normal     | Pancreatitis, chronic                               | NULL                               | Normal       |
| N3     | Male   | 74  | Normal     | Tumor of pancreas, intraductal, papillary, mucinous | Other Histologic Grade             | Normal       |
| N4     | Female | 57  | Normal     | Tumor of pancreas, Islet cell                       | Not Reported                       | Normal       |
| C1     | Female | 79  | Tumor      | Adenocarcinoma of pancreas, ductal                  | AJCC G3: Poorly differentiated     | IB           |
| C2     | Male   | 57  | Tumor      | Adenocarcinoma of pancreas                          | AJCC G2: Moderately differentiated | IIB          |
| C3     | Male   | 75  | Tumor      | Adenocarcinoma of pancreas, ductal                  | AJCC G2: Moderately differentiated | IIB          |
| C4     | Female | 71  | Tumor      | Adenocarcinoma of pancreas, ductal                  | AJCC G3: Poorly differentiated     | III          |
| C5     | Male   | 69  | Tumor      | Adenocarcinoma of pancreas, ductal                  | AJCC G3: Poorly differentiated     | III          |
| C6     | Female | 69  | Tumor      | Tumor of pancreas, neuroendocrine                   | AJCC G1: Well differentiated       | Not Reported |
| C7     | Female | 73  | Tumor      | Tumor of pancreas, neuroendocrine, metastatic       | AJCC G1: Well differentiated       | Not Reported |
| C8     | Female | 60  | Tumor      | Tumor of pancreas, neuroendocrine                   | Not Reported                       | Not Reported |
| C9     | Male   | 50  | Tumor      | Tumor of pancreas, Islet cell                       | Not Reported                       | Not Reported |
| C10    | Male   | 66  | Tumor      | Tumor of pancreas, neuroendocrine                   | Not Reported                       | Not Reported |
| C11    | Female | 64  | Tumor      | Tumor of pancreas, neuroendocrine                   | Not Reported                       | Not Reported |
| C12    | Female | 60  | Tumor      | Tumor of pancreas, neuroendocrine                   | Not Reported                       | Not Reported |
| C13    | Female | 60  | Tumor      | Tumor of pancreas, neuroendocrine                   | Not Reported                       | Not Reported |
| C14    | Female | 61  | Tumor      | Tumor of pancreas, neuroendocrine                   | Not Reported                       | Not Reported |
| C15    | Male   | 51  | Tumor      | Tumor of pancreas, Islet cell                       | Not Reported                       | Not Reported |
| C16    | Male   | 31  | Tumor      | Tumor of pancreas, Islet cell                       | Not Reported                       | Not Reported |
| C17    | Male   | 76  | Tumor      | Tumor of pancreas, Islet cell                       | Not Reported                       | Not Reported |
| C18    | Female | 57  | Tumor      | Tumor of pancreas, neuroendocrine                   | Not Reported                       | Not Reported |

**Supplementary Table 2: Genes profiled for RT-PCR profiler array**

|        |          |         |        |        |       |          |       |        |        |        |        |
|--------|----------|---------|--------|--------|-------|----------|-------|--------|--------|--------|--------|
| AHNAK  | AKT1     | BMP1    | BMP2   | BMP7   | CALD1 | CAMK2N1  | CAV2  | CDH1   | CDH2   | COL1A2 | COL3A1 |
| COL5A2 | CTNNA1   | DSC2    | DSP    | EGFR   | ERBB3 | ESR1     | F11R  | FGFBP1 | FN1    | FOXC2  | FZD7   |
| GNG11  | GSC      | GSK3B   | IGFBP4 | IL1RN  | ILK   | ITGA5    | ITGAV | ITGB1  | JAG1   | KRT14  | KRT19  |
| KRT7   | MAP1B    | MMP2    | MMP3   | MMP9   | MSN   | MST1R    | NODAL | NOTCH1 | NUDT13 | OCLN   | PDGFRB |
| PLEK2  | PPPDE2   | PTK2    | PTP4A1 | RAC1   | RGS2  | SERPINE1 | SIP1  | SMAD2  | SNAI1  | SNAI2  | SNAI3  |
| SOX10  | SPARC    | SPP1    | STAT3  | STEAP1 | TCF3  | TCF4     | TFPI2 | TGFB1  | TGFB2  | TGFB3  | TIMP1  |
| TMEFF1 | TMEM132A | TSPAN13 | TWIST1 | VCAN   | VIM   | VPS13A   | WNT11 | WNT5A  | WNT5B  | ZEB1   | ZEB2   |
| ACTB   | B2M      | GAPDH   | HPRT1  | RPLP0  | HGDC  | RTC      | RTC   | RTC    | PPC    | PPC    | PPC    |

**Supplementary Table 3: List of EMT-related genes (including house-keeping genes) from a RT-PCR profiler array with fold changes on SET overexpression (SET-HA) compared with control cells (pLNCX2) in PANC-1.**

See Supplementary File 1

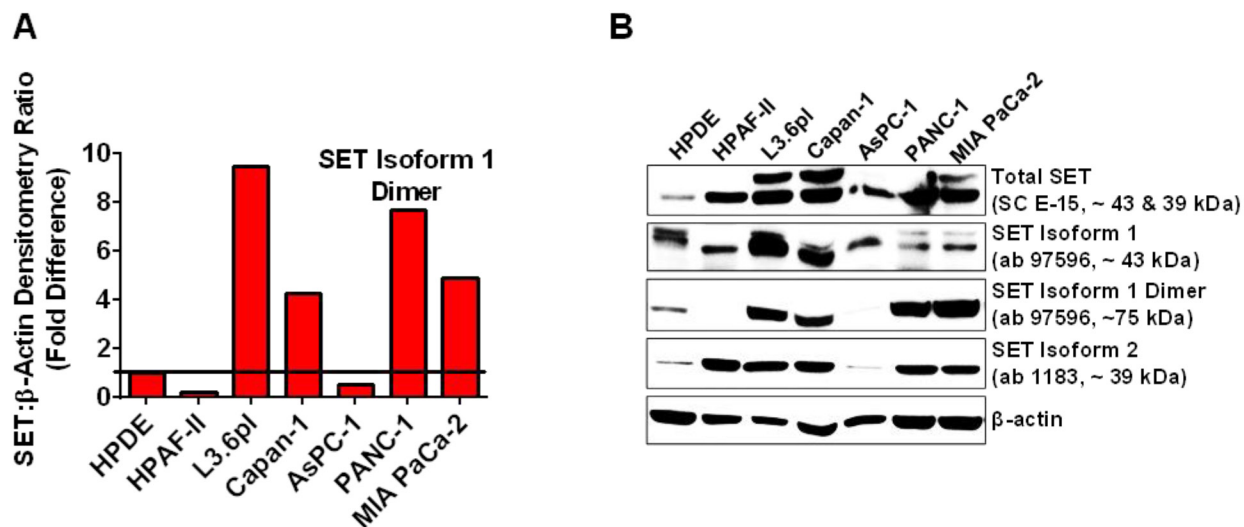

**Supplementary Figure 1:** (A) The bands of SET Isoform 1 dimer from Fig. 1B were quantified by densitometry and SET:β-actin ratios plotted. (B) Protein levels of Total SET, SET isoform 1, and SET isoform 2 in a panel of pancreatic cancer cells. Whole cell lysates (50 μg) prepared with HEPES Lysis Buffer were subjected to Western blotting analysis. β-actin, the internal loading control, is shown with a representative blot.

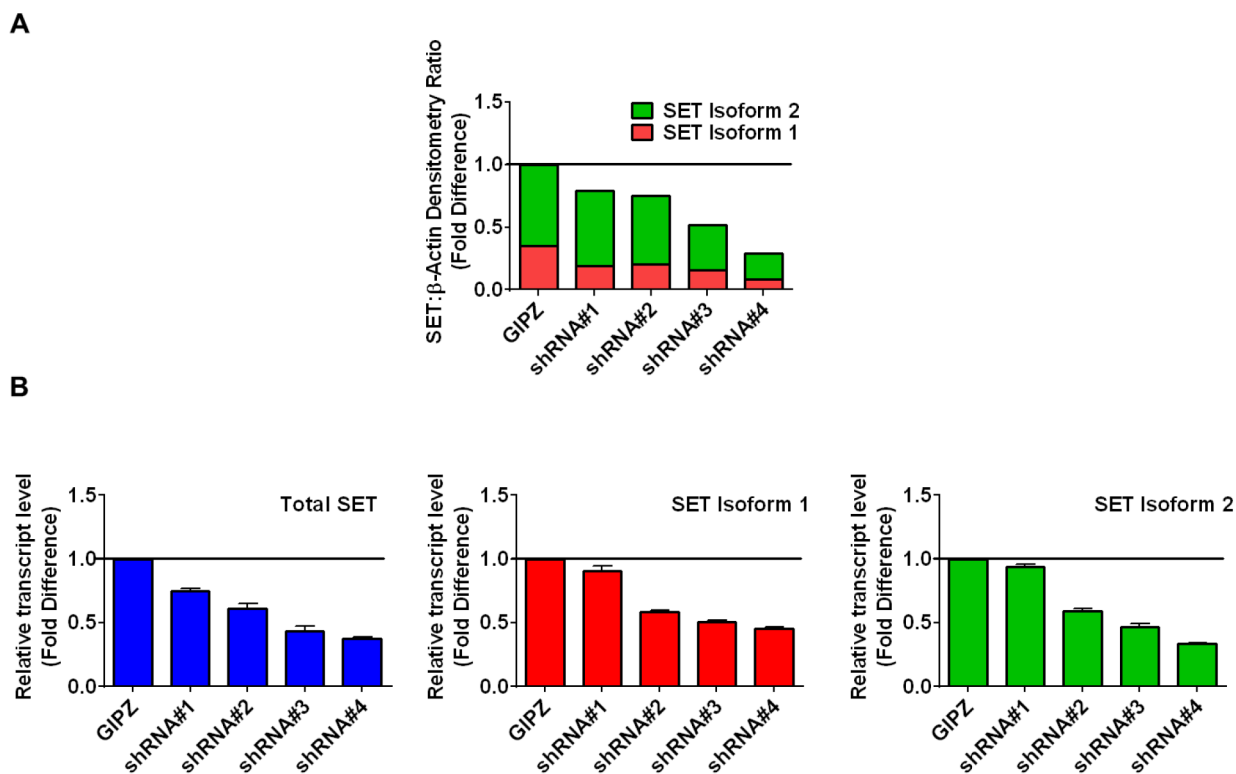

**Supplementary Figure 2: Stable knockdown of SET (SET-shRNA) in MIA PaCa-2.** (A) Protein levels of SET Isoform 1 and Isoform 2 in SET shRNA (From Fig 3C) transduced MIA PaCa-2 cells were quantified by densitometry and SET:β-actin ratios plotted. (B) Expression levels of total SET, isoform 1, and isoform 2 transcripts in MIA PaCa-2 SET-shRNAs analyzed by qRT-PCR with taqman probe. GUSB was used as an internal control. Bars, SD.

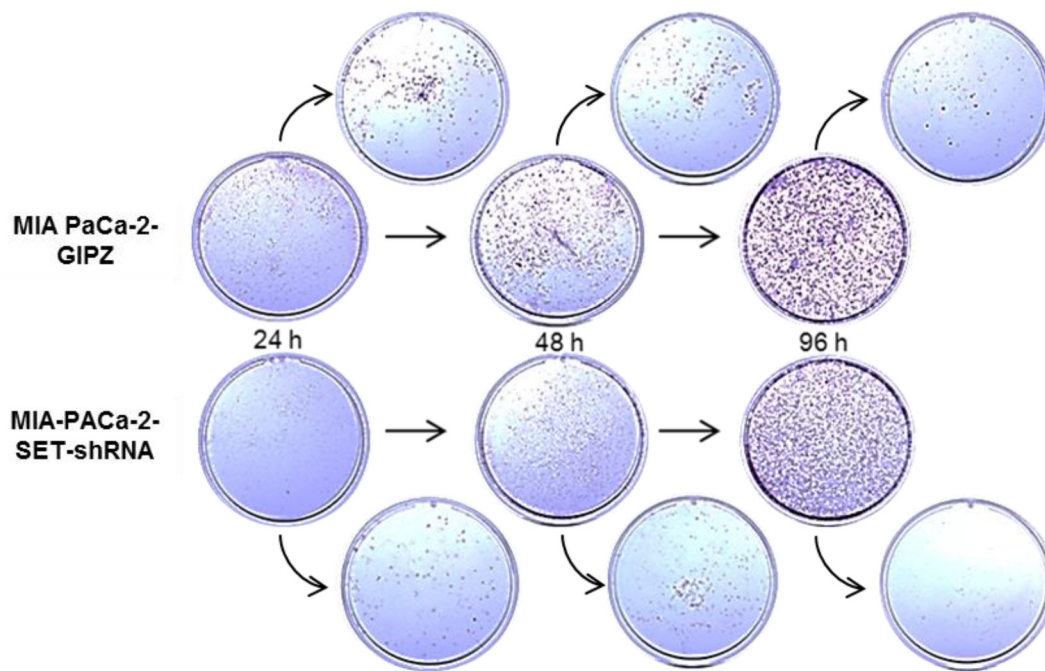

**Supplementary Figure 3: Supernatants were collected from cells cultured in primary dishes for the indicated time periods and reseeded and cultured in secondary dishes (curved arrows). After 14 days, colonies developed in secondary dishes were fixed and stained with methylene blue for visualization.**

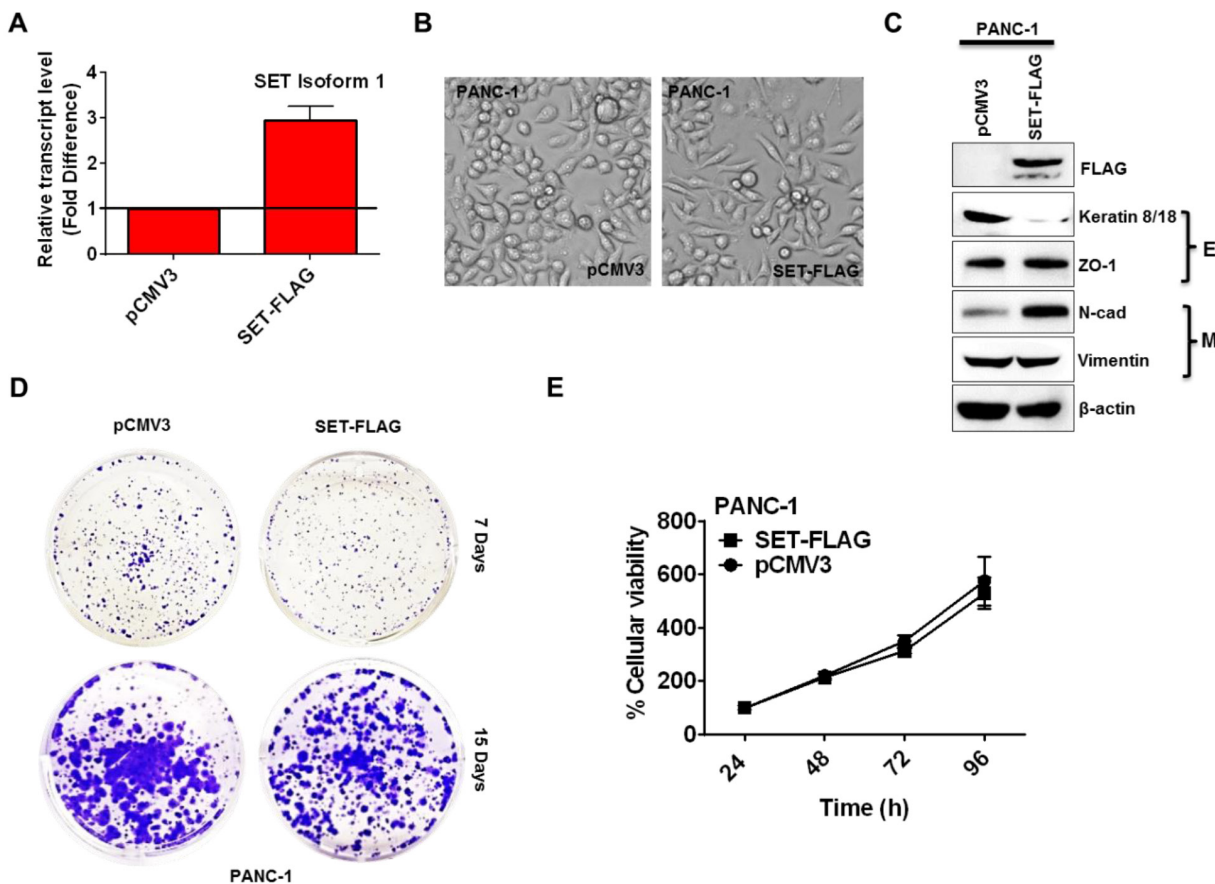

**Supplementary Figure 4: SET isoform 1 induces EMT-like characteristics but has no effect on growth of pancreatic cancer cells.** (A) Stable overexpression of SET Isoform 1 (SET-FLAG) in PANC-1. Expression levels of SET Isoform 1 transcripts in PANC-1 stably overexpressing SET Isoform 1 analyzed by qRT-PCR with taqman probe. GUSB was used as an internal control. (B-C) SET isoform 1 (SET-FLAG) overexpression induces EMT like characteristics in PANC-1. (B) Cells with overexpression of SET Isoform 1 have a more mesenchymal morphology as compared with control cells (pCMV3). (C) Overexpression of SET isoform 1 in PANC-1 increases N-cadherin and decreases Keratin 8/18 protein levels. Whole cell lysates (50 µg) were subjected to Western blotting analysis. β-actin, the internal loading control, is shown with a representative blot. (D and E) Expression of SET isoform 1 does not significantly affect the colony formation abilities (D) or the cellular proliferation (E) of PANC-1 unlike SET Isoform 2. For colony formation assays, cells were fixed and stained with crystal violet at indicated time points (D). For cellular viability assays, cells were grown for 96 h and % cellular viability was measured with MTT assay (E). Bars, SD.

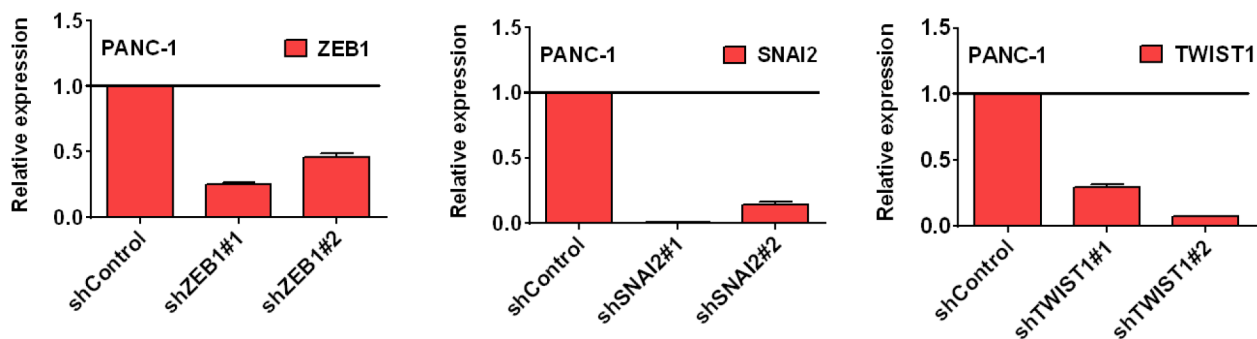

**Supplementary Figure 5: Knockdown of EMT-regulating transcription factors (ZEB1, SNAI2, and TWIST1) in PANC-1.** Stable knockdown of ZEB1, SNAI2 (Slug), and TWIST1 using respective shRNAs#1-2 in PANC-1. Transcript levels of individual genes analyzed with qRT-PCR and compared against control cells. GUSB was used as an internal control. Bars, SD.

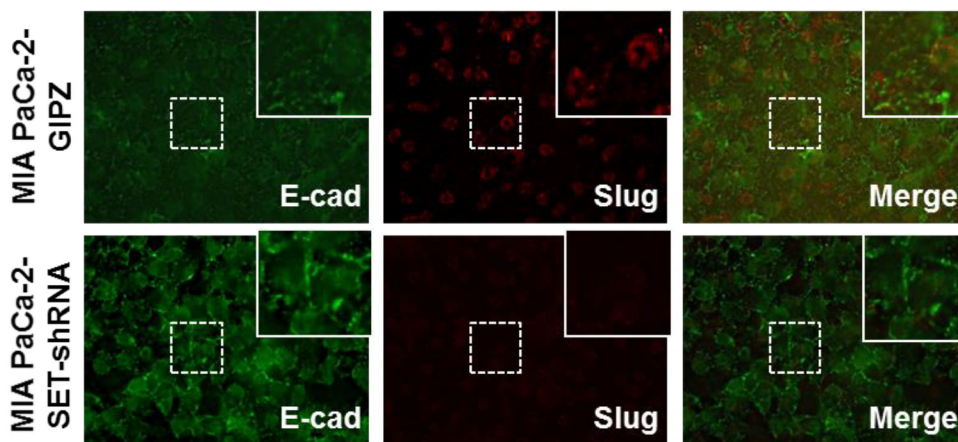

Supplementary Figure 6: E-cadherin and Slug expressions were oppositely correlated in MIA PaCa-2 (GIPZ & SET-shRNA). Slug (red) is expressed in the cytoplasm, while E-cadherin (green) is expressed on the cell surface. E-cadherin images in the left panels (MIA PaCa-2 GIPZ and MIA PaCa-2 SET-shRNA) are also shown in Fig. 4E.

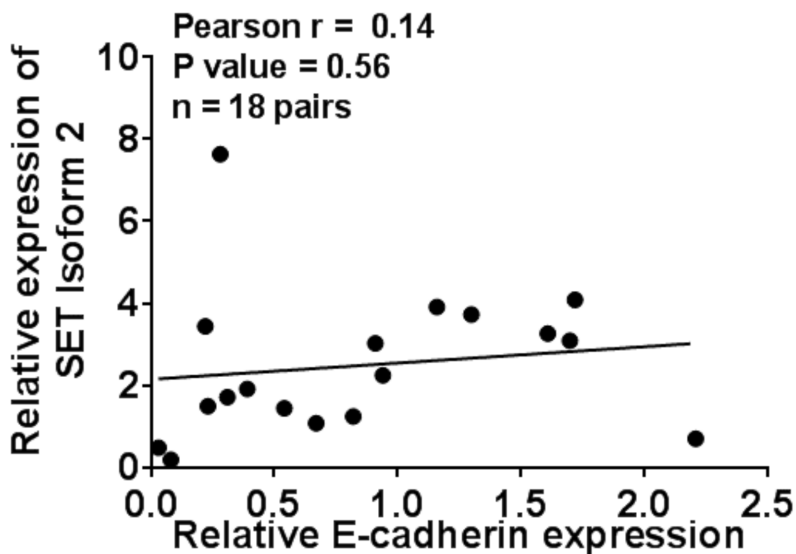

Supplementary Figure 7: E-cadherin transcripts showed no correlation with SET Isoform 2 expression in pancreatic cancer tissues (n = 18).
